# Supplementary material
Source: PubMed Central journal article supplement (PMC8820589)
Supplement: NIHMS1763798-supplement-1.pdf [file NIHMS1763798-supplement-1.pdf]

**Supplemental Fig. 1**

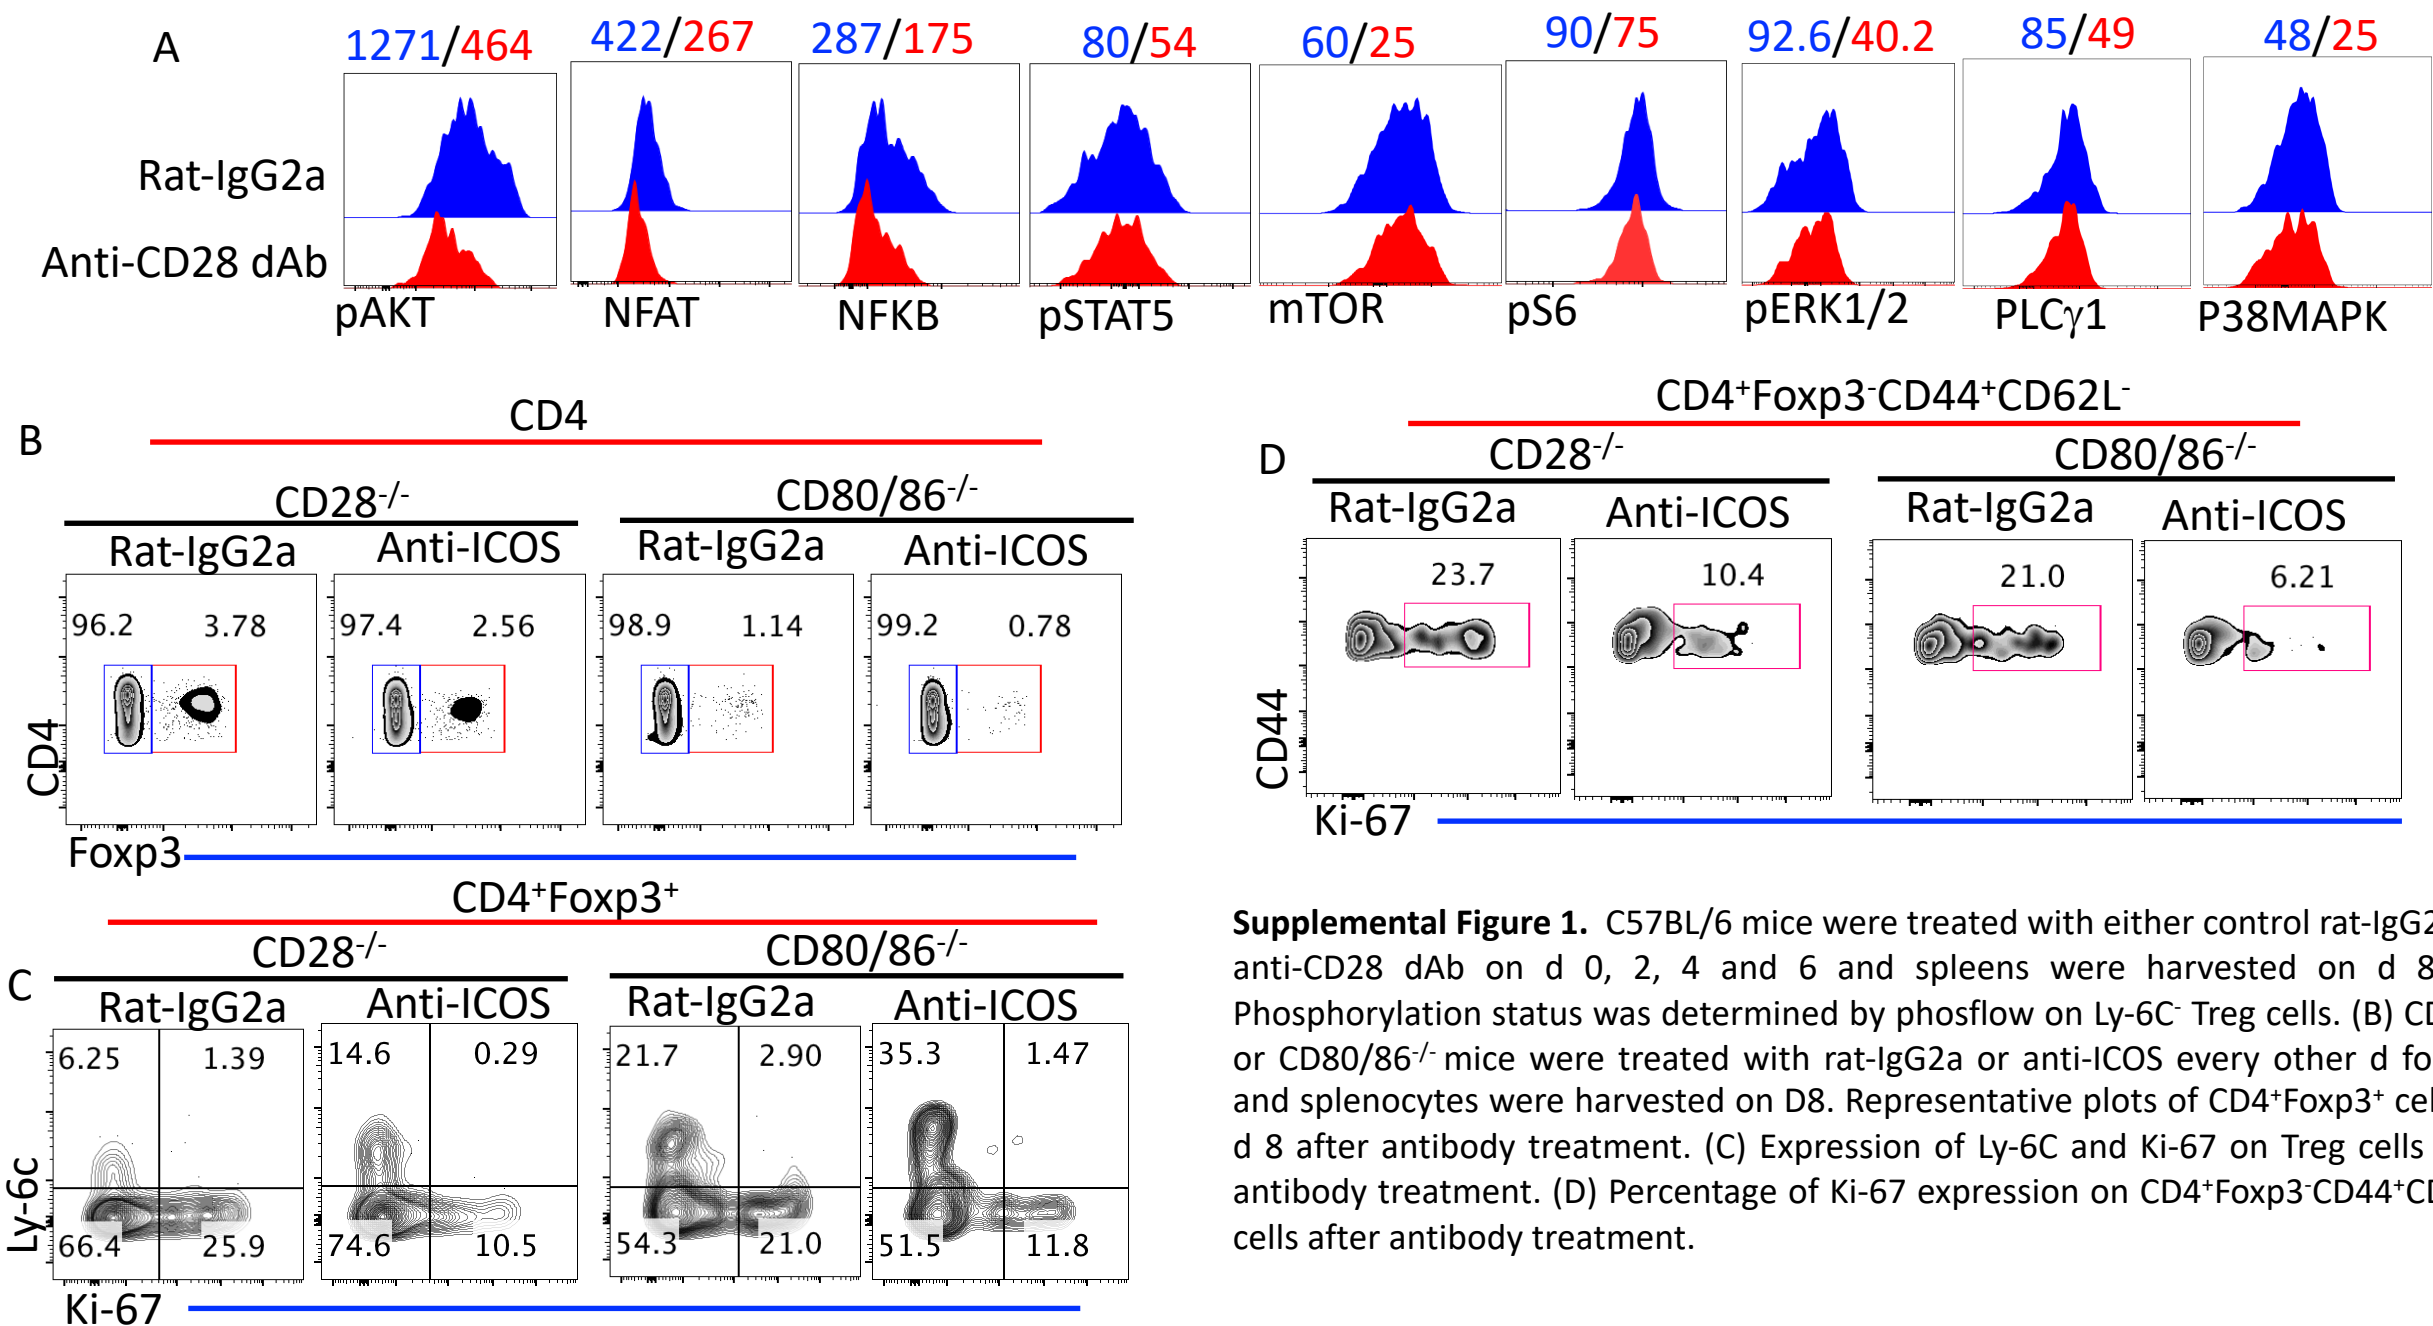

**Supplemental Figure 1.** C57BL/6 mice were treated with either control rat-IgG2a, or anti-CD28 dAb on d 0, 2, 4 and 6 and spleens were harvested on d 8. (A) Phosphorylation status was determined by phosflow on Ly-6C<sup>-</sup> Treg cells. (B) CD28<sup>-/-</sup> or CD80/86<sup>-/-</sup> mice were treated with rat-IgG2a or anti-ICOS every other d for 6 d and splenocytes were harvested on D8. Representative plots of CD4<sup>+</sup>Foxp3<sup>+</sup> cells on d 8 after antibody treatment. (C) Expression of Ly-6C and Ki-67 on Treg cells after antibody treatment. (D) Percentage of Ki-67 expression on CD4<sup>+</sup>Foxp3<sup>-</sup>CD44<sup>+</sup>CD62L<sup>-</sup> cells after antibody treatment.

# Supplemental Fig. 2

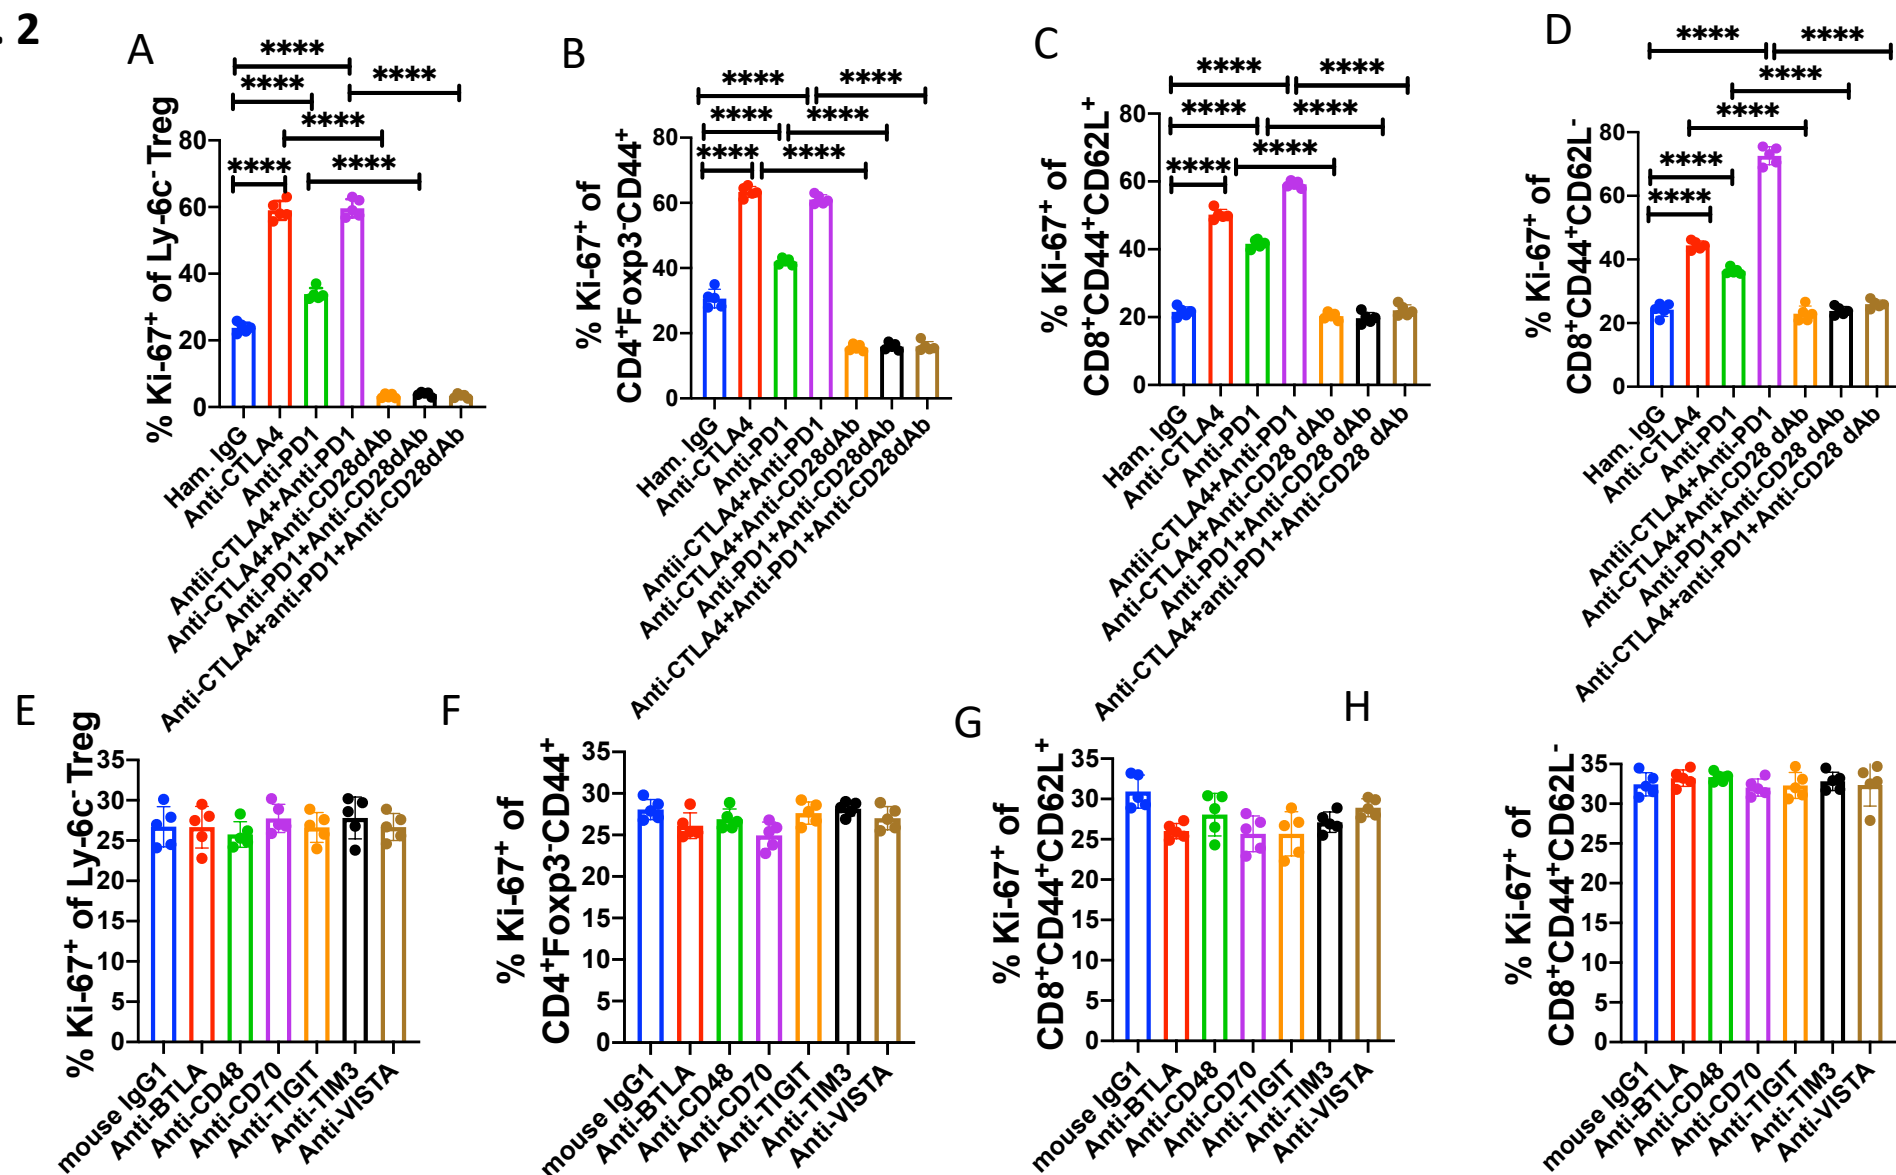

**Supplemental Figure 2.** C57BL/6 mice were treated (i.p.) either anti-CTLA4, anti-PD1 or both or together with anti-CD28 dAb every other day for 6 d and splenocytes were harvested on d 8. Percentage of Ki-67 expression among: (A) Ly-6c<sup>-</sup>Treg, (B) CD4<sup>+</sup>Foxp3<sup>+</sup>CD44<sup>+</sup>, (C) CD8<sup>+</sup>CD44<sup>+</sup>CD62L<sup>+</sup>, and (D) CD8<sup>+</sup>CD44<sup>+</sup>CD62L<sup>-</sup> subsets after antibody treatment. C57BL/6 mice were treated with mouse-IgG1, anti-BTLA, anti-CD48, anti-CD70, anti-TIGIT (agonistic), anti-TIM3 and anti-VISTA every other d for 6 d and immunophenotyping of splenocytes was performed on d 8. Percentage of Ki-67 expression on (E) Ly-6c<sup>-</sup>Treg, (F) CD4<sup>+</sup>Foxp3<sup>+</sup>CD44<sup>+</sup>, (G) CD8<sup>+</sup>CD44<sup>+</sup>CD62L<sup>+</sup>, and (H) CD8<sup>+</sup>CD44<sup>+</sup>CD62L<sup>-</sup> subsets in treated mice.

# Supplemental Fig. 3

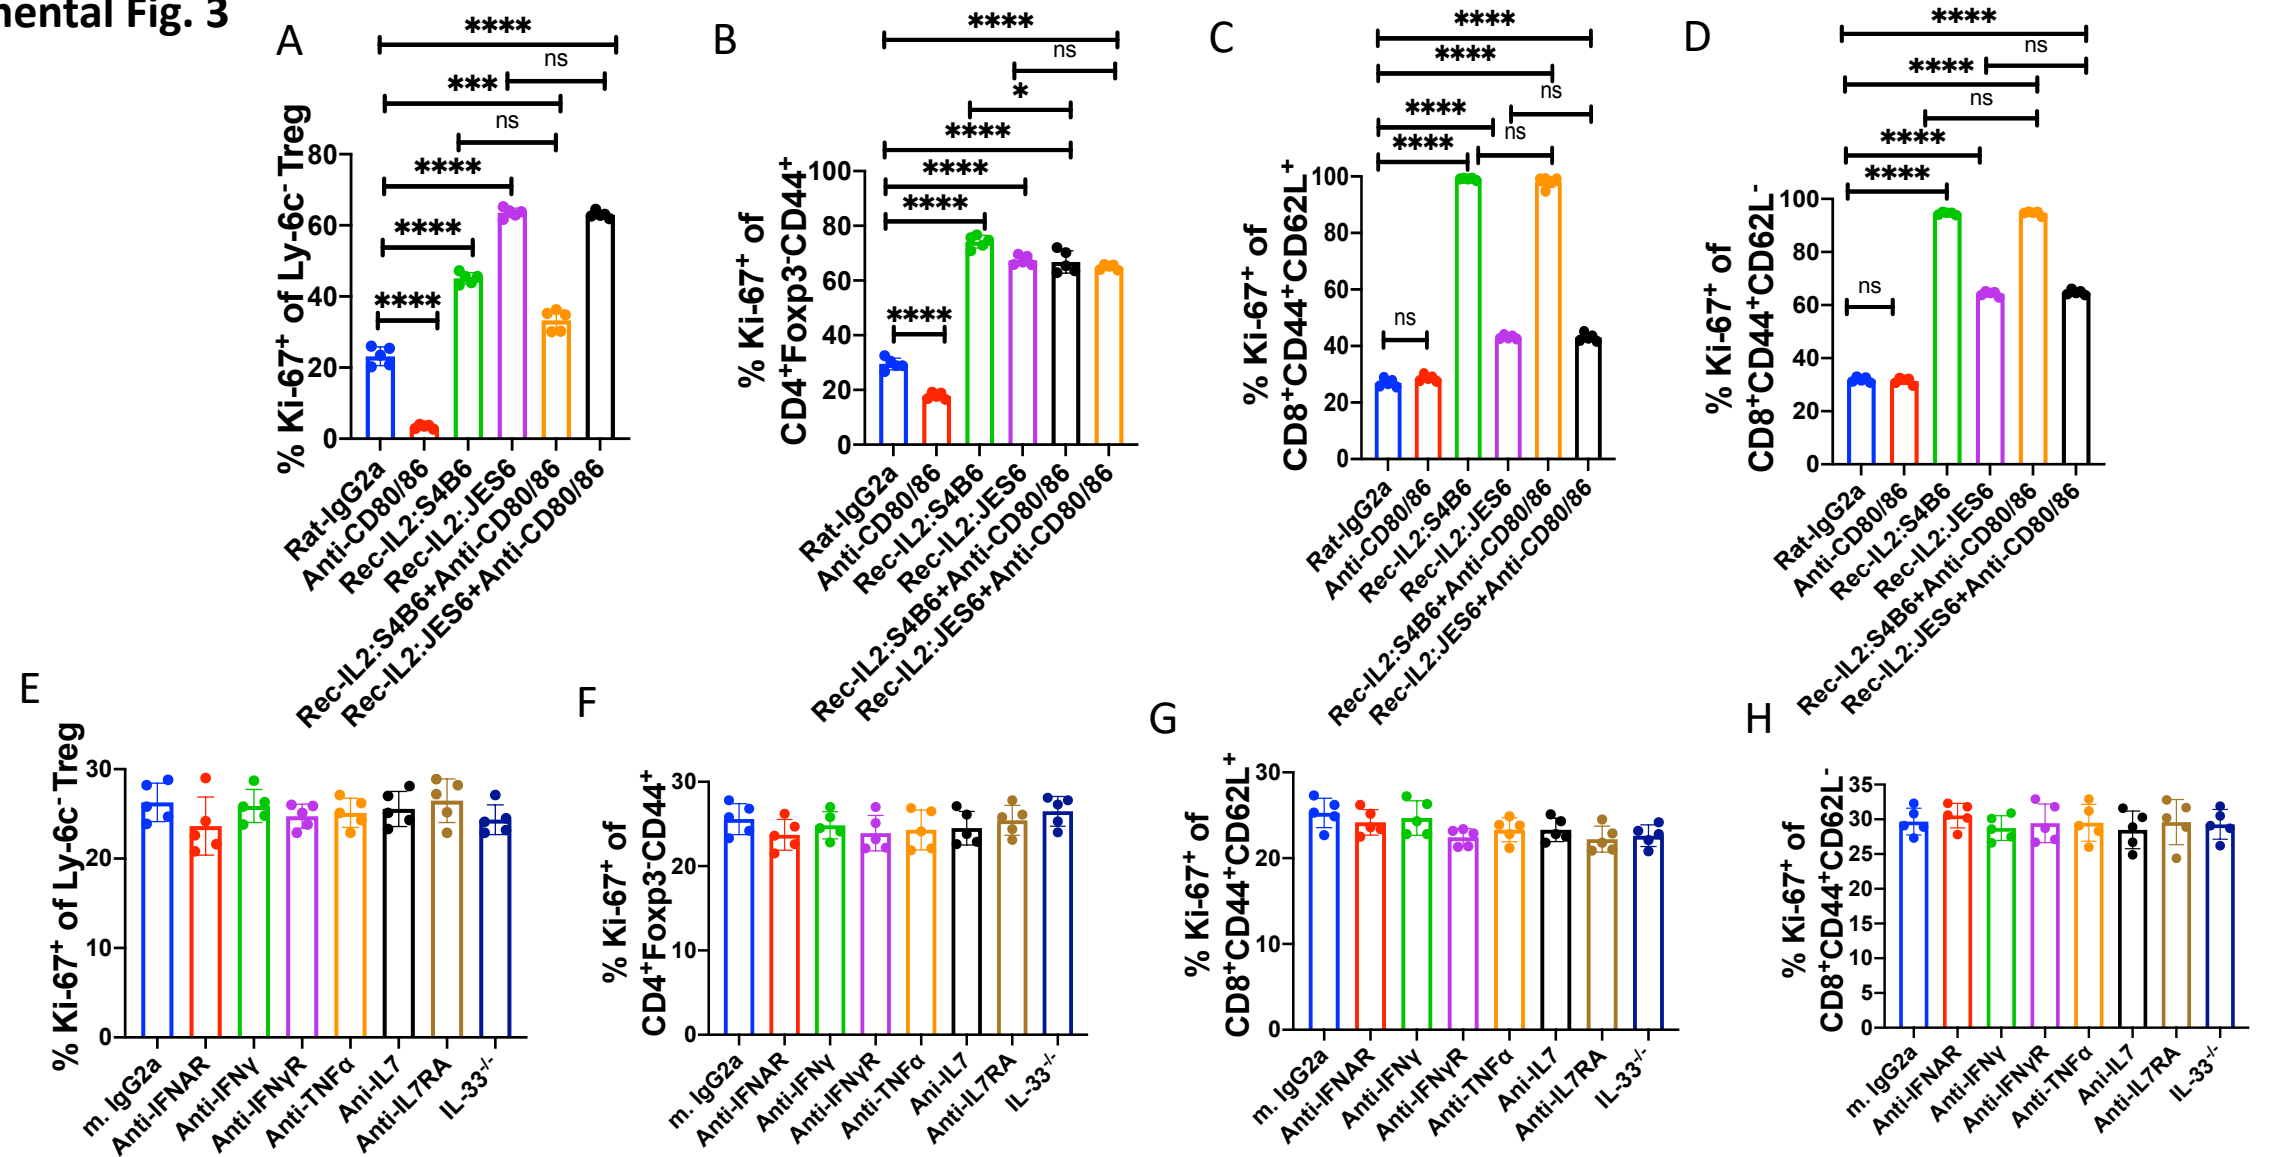

**Supplemental Figure 3.** C57BL/6 mice were treated with (i.p.) either IL2:S4B6, IL2:JES6 alone in combination with anti-CD80/86 on d 0, 2, 4 and 6 and splenocytes were isolated on d 8 for immune phenotyping. Percentage of Ki-67 expression among (A) Ly-6C<sup>-</sup> Treg, (B) CD4<sup>+</sup>Foxp3<sup>+</sup>CD44<sup>+</sup> (C) CD8<sup>+</sup>CD44<sup>+</sup>CD62L<sup>+</sup> and (D) CD8<sup>+</sup>CD44<sup>+</sup>CD62L<sup>-</sup> subsets after antibody treatment. C57BL/6 mice were treated with mIgG2a, anti-IFNAR, anti-IFN $\gamma$ , anti-IFN $\gamma$ R, anti-TNF $\alpha$ , anti-IL-7 and anti-IL7Ra (250 $\mu$ g/dose) i.p every other d for 6 d and immunophenotyping of splenocytes was performed on d 8. Percentage of Ki-67 expression on (E) Ly-6C<sup>-</sup>Treg, (F) CD4<sup>+</sup>Foxp3<sup>+</sup>CD44<sup>+</sup> (G) CD8<sup>+</sup>CD44<sup>+</sup>CD62L<sup>+</sup> and (H) CD8<sup>+</sup>CD44<sup>+</sup>CD62L<sup>-</sup> subsets in mAb treated or IL-33<sup>-/-</sup> mice.

# Supplemental Fig. 4

A

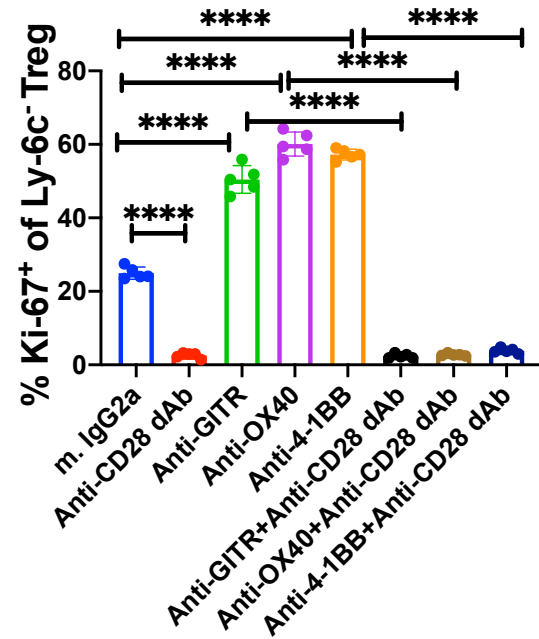

B

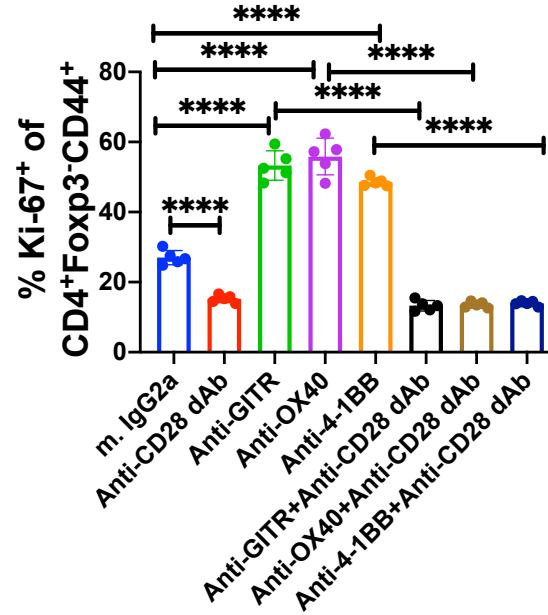

C

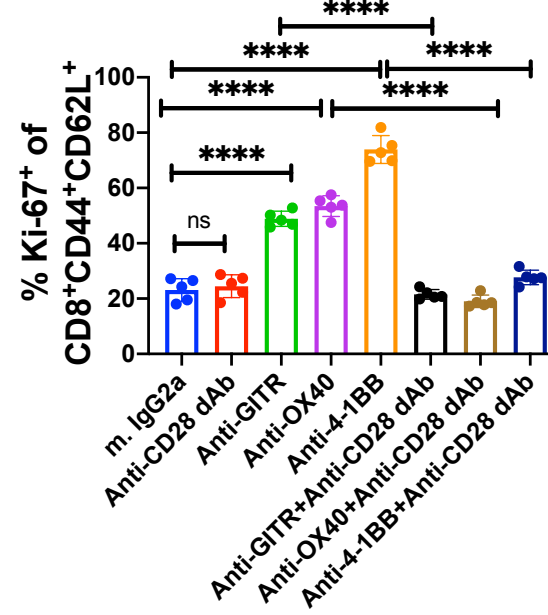

D

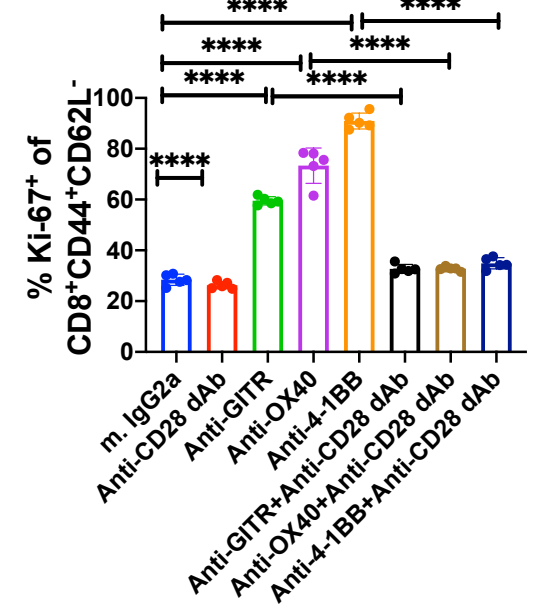

**Supplemental Figure 4.** C57BL/6 animals were injected (i.p.) with anti-GITR, anti-OX40, anti-4-1BB (250µg/dose) alone or together with anti-CD28 dAb (100µg/dose) on d 0, 2, 4 and 6 and splenocytes were harvested on d 8. Percentage of Ki-67 expression among (A) Ly-6C-Treg, (B) CD4<sup>+</sup>Foxp3<sup>+</sup>CD44<sup>+</sup> (C) CD8<sup>+</sup>CD44<sup>+</sup>CD62L<sup>+</sup> and (D) CD8<sup>+</sup>CD44<sup>+</sup>CD62L<sup>-</sup> subsets after antibody treatments.
